- gram and arterial pressure waveforms? *Anesth Analg* 2008; 106:1189-94
35. Golparvar M, Naddafnia H, Saghaei M: Evaluating the relationship between arterial pressure changes and indices of pulse oximetric plethysmography. *Anesth Analg* 2002; 95:1686-90
  36. Natalini G, Rosano A, Franceschetti ME, Facchetti P, Bernardini A: Variations in arterial blood pressure and photoplethysmography during mechanical ventilation. *Anesth Analg* 2006; 103:1182-8
  37. Solus-Biguenet H, Fleyfel M, Tavernier B, Kipnis E, Onimus J, Robin E, Lebuffe G, Decoene C, Pruvot FR, Vallet B: Non-invasive prediction of fluid responsiveness during major hepatic surgery. *Br J Anaesth* 2006; 97:808-16
  38. Wyffels PAH, Durnez P-J, Helderweirt J, Stockman WMA, De Kegel D: Ventilation-induced plethysmographic variations predict fluid responsiveness in ventilated postoperative patients. *Anesth Analg* 2007; 105:448-52
  39. Landsverk SA, Hoiseth LO, Kvandal P, Hisdal J, Skare O, Kirkeboen KA: Poor agreement between respiratory variations in pulse oximetry photoplethysmographic waveform amplitude and pulse pressure in intensive care unit patients. *ANESTHESIOLOGY* 2008; 109:849-55
  40. Bijker JB, van Klei WA, Kappen TH, van Wolfswinkel L, Moons KGM, Kalkman CJ: Incidence of intraoperative hypotension as a function of chosen definition. *ANESTHESIOLOGY* 2007; 107:213-20

## ANESTHESIOLOGY REFLECTIONS

### Nevius' 1894 *Discovery of Modern Anesthesia*

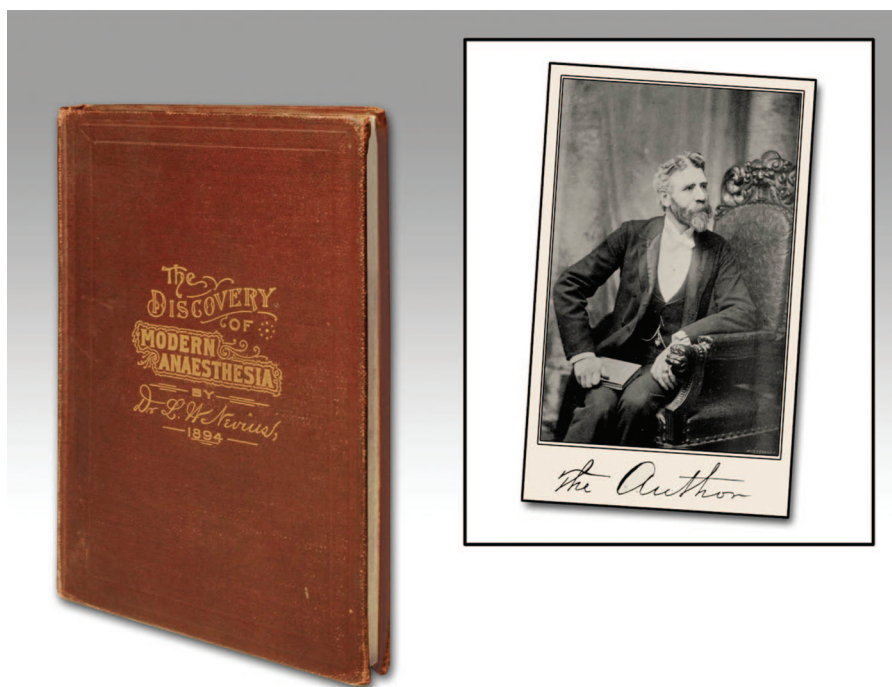

From the stacks of the Wood Library-Museum, this elegant volume is awkwardly titled *The Discovery of Modern Anesthesia. By Whom It Was Made. A Brief Statement of Facts*. Authored by dentist Laird W. Nevius (1845–1915), this book attempted to fairly portray the leading figures behind dental and surgical anesthesia. This was a remarkable effort, particularly since Nevius was a disciple of G. Q. Colton, who clearly backed Horace Wells as the “Discoverer of Anesthesia.” Upon reviewing Nevius’ book in 1894, the journal *Dental Cosmos* observed that the “whole controversy, from 1847 to the present time, has been no more marked by acrimony than it has been by a disposition to laud those who applied the scientific discoveries more than the original suggestors [sic] of the agents to be employed.” (Copyright © the American Society of Anesthesiologists, Inc. This image appears in color in the *Anesthesiology Reflections* online collection available at [www.anesthesiology.org](http://www.anesthesiology.org).)

George S. Bause, M.D., M.P.H., Honorary Curator, ASA’s Wood Library-Museum of Anesthesiology, Park Ridge, Illinois, and Clinical Associate Professor, Case Western Reserve University, Cleveland, Ohio. [UJYC@aol.com](mailto:UJYC@aol.com).
